# Supplementary material for: DNA-methylation age and accelerated epigenetic aging in blood as a tumor marker for predicting breast cancer susceptibility
Source: publisher site journal article supplement (doi:10.18632/aging.206169), 2024-12-05
Supplement: Supplementary file [file aging-v16-206169-supplementary-material-SD1.pdf]

SUPPLEMENTARY FIGURES

< By oophorectomy >

No ovaries removed

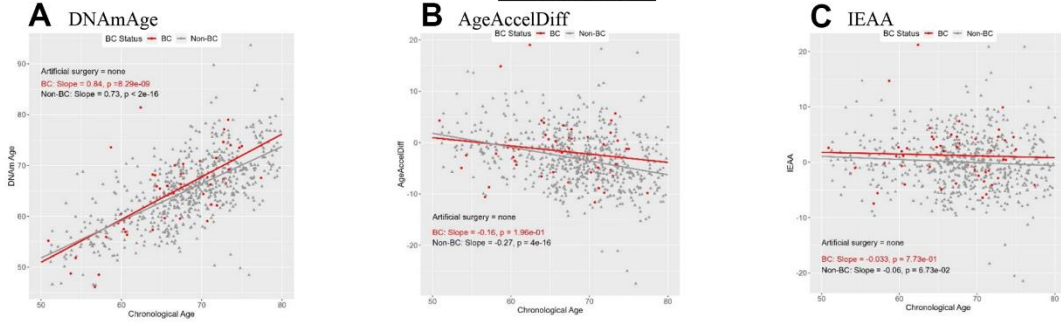

Bilateral oophorectomy

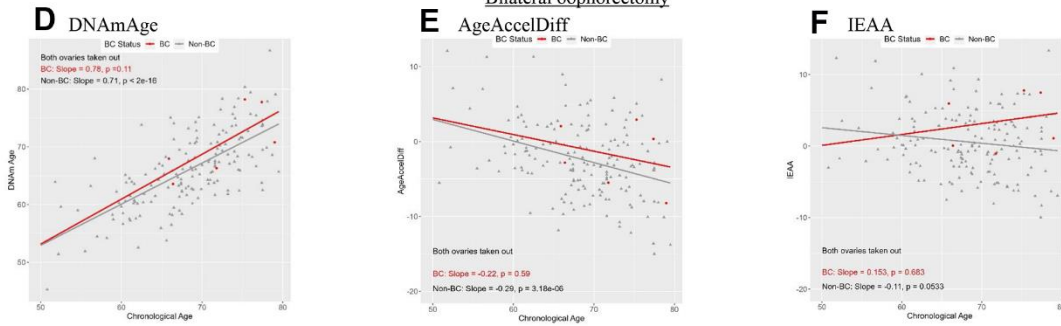

< By unopposed estrogen use status >

None

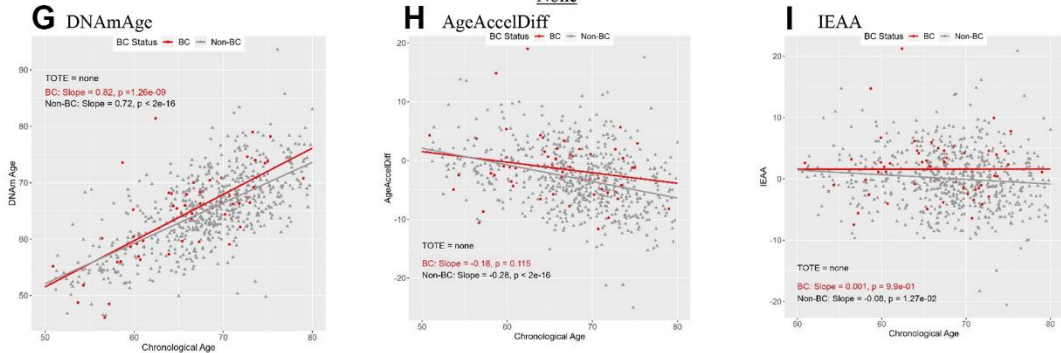

< 5 years

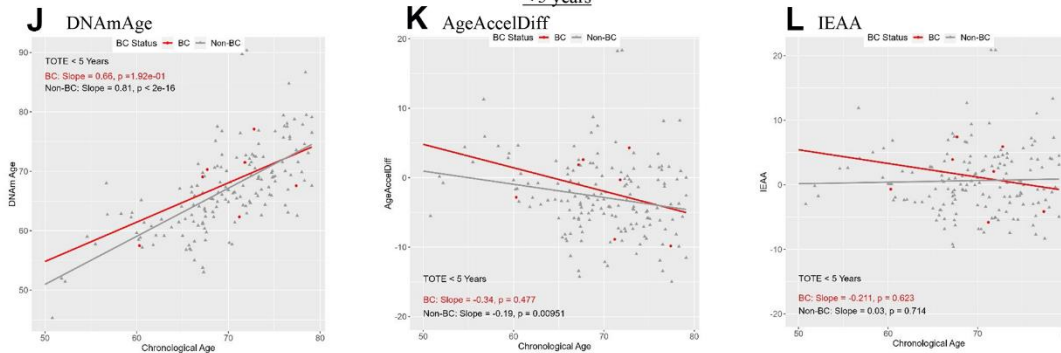

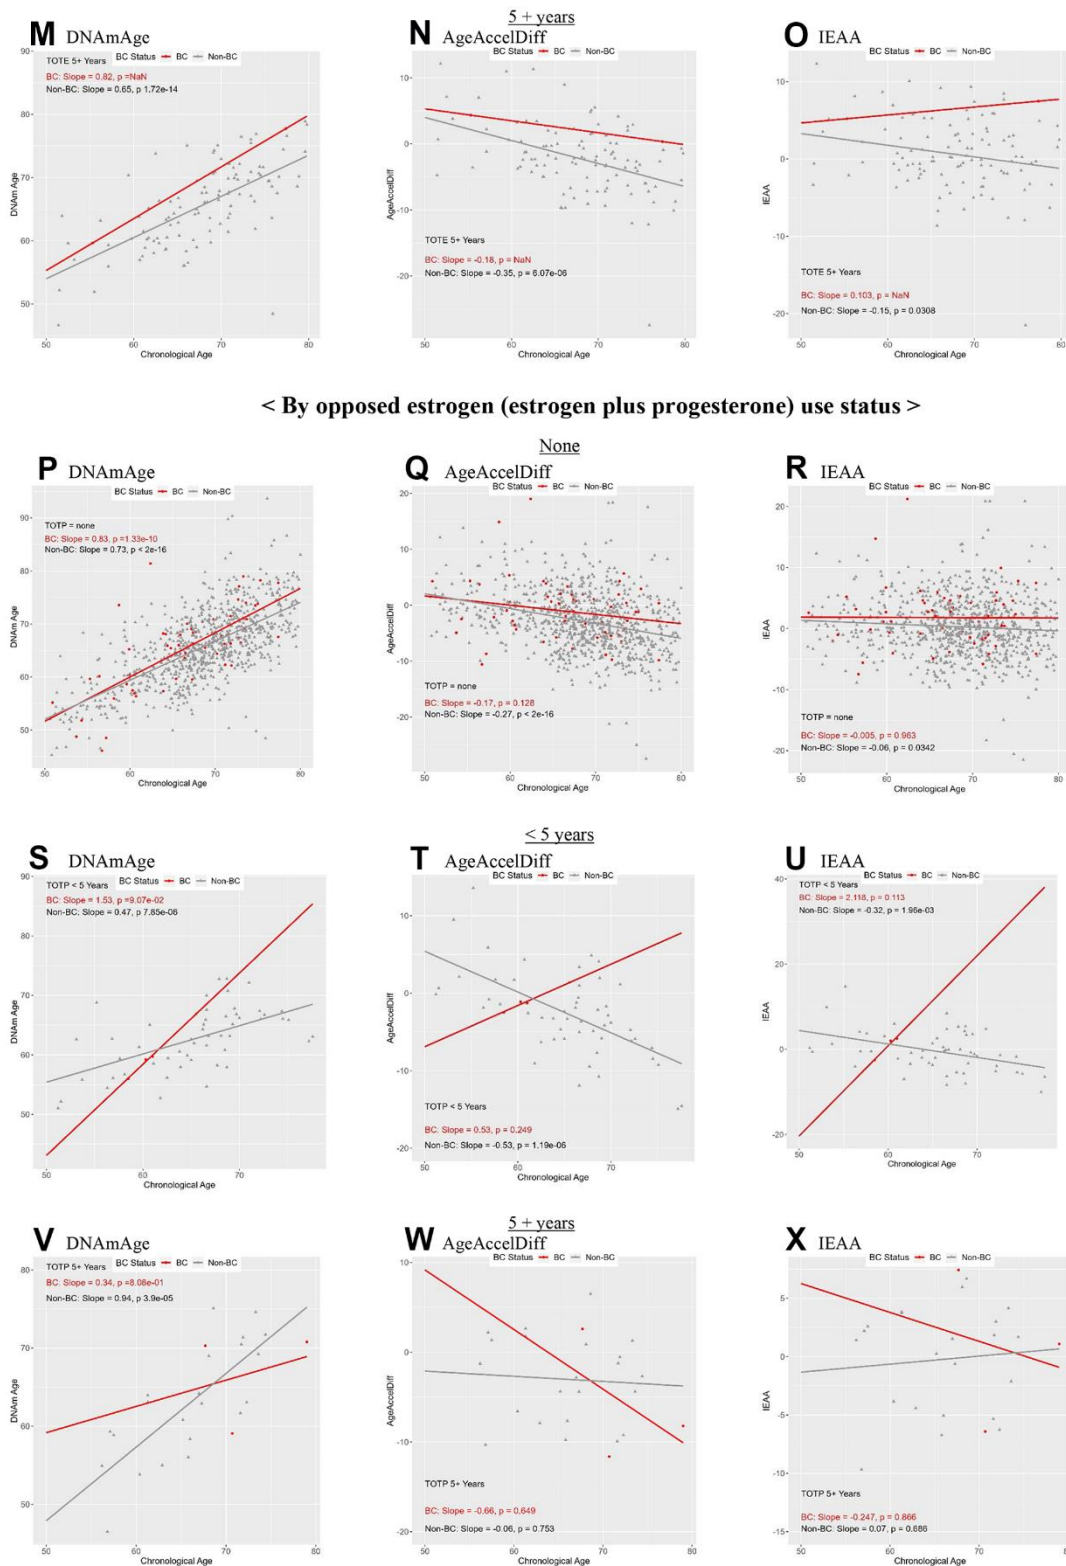

< By opposed estrogen (estrogen plus progesterone) use status >

**Supplementary Figure 1. Correlation between DNAmAge/AgeAccelDiff/IEAA and chronologic age by BC status.** By oophorectomy, (A–C) no ovaries removed, (D–F) bilateral. By unopposed estrogen use status, (G–I) none, (J–L) < 5 years, (M–O) 5+ years. By opposed estrogen (estrogen plus progesterone) use status, (P–R) none, (S–U) < 5 years, (V–X) 5+ years. (AgeAccelDiff, epigenetic age acceleration measured as departure of DNAmAge from chronologic age; IEAA, intrinsic epigenetic age acceleration measured as residuals by regressing DNAmAge on chronologic age, adjusted for cell composition; BC, breast cancer; DNAmAge, DNA methylation–based marker of aging).

### A DNAmAge

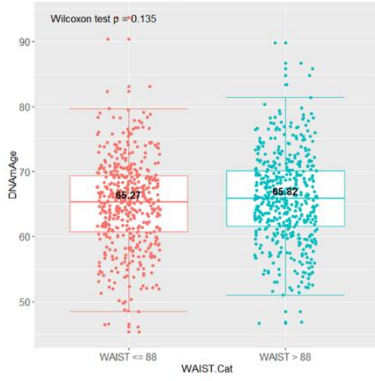

### B AgeAccelDiff

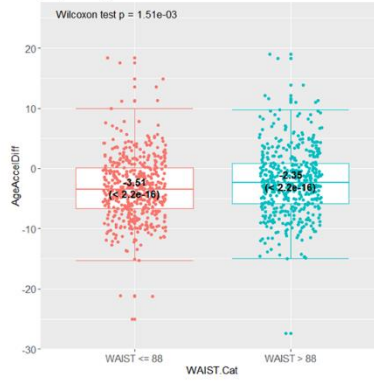

### C IEAA

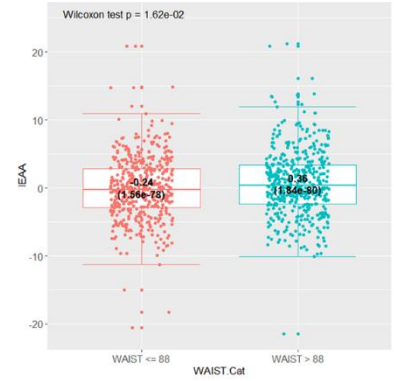

### D DNAmAge

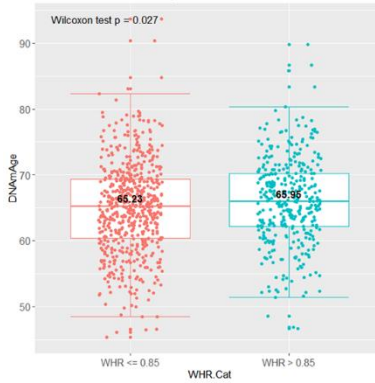

### E AgeAccelDiff

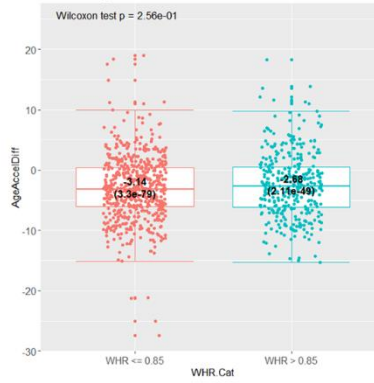

### F IEAA

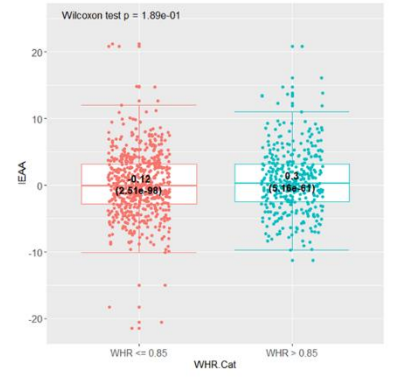

### G DNAmAge

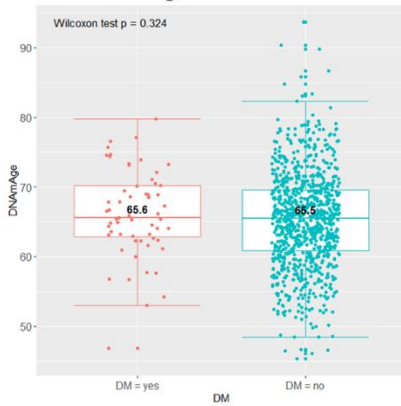

### H AgeAccelDiff

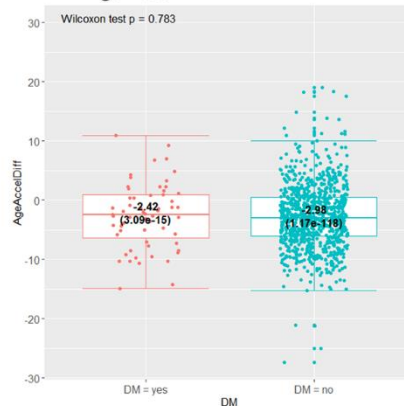

### I IEAA

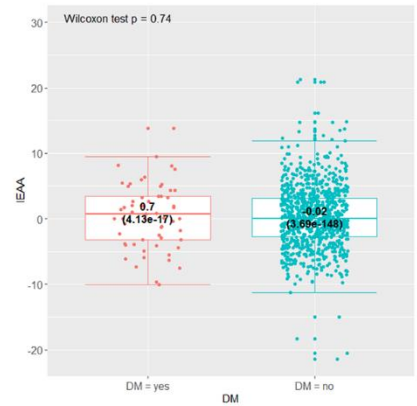

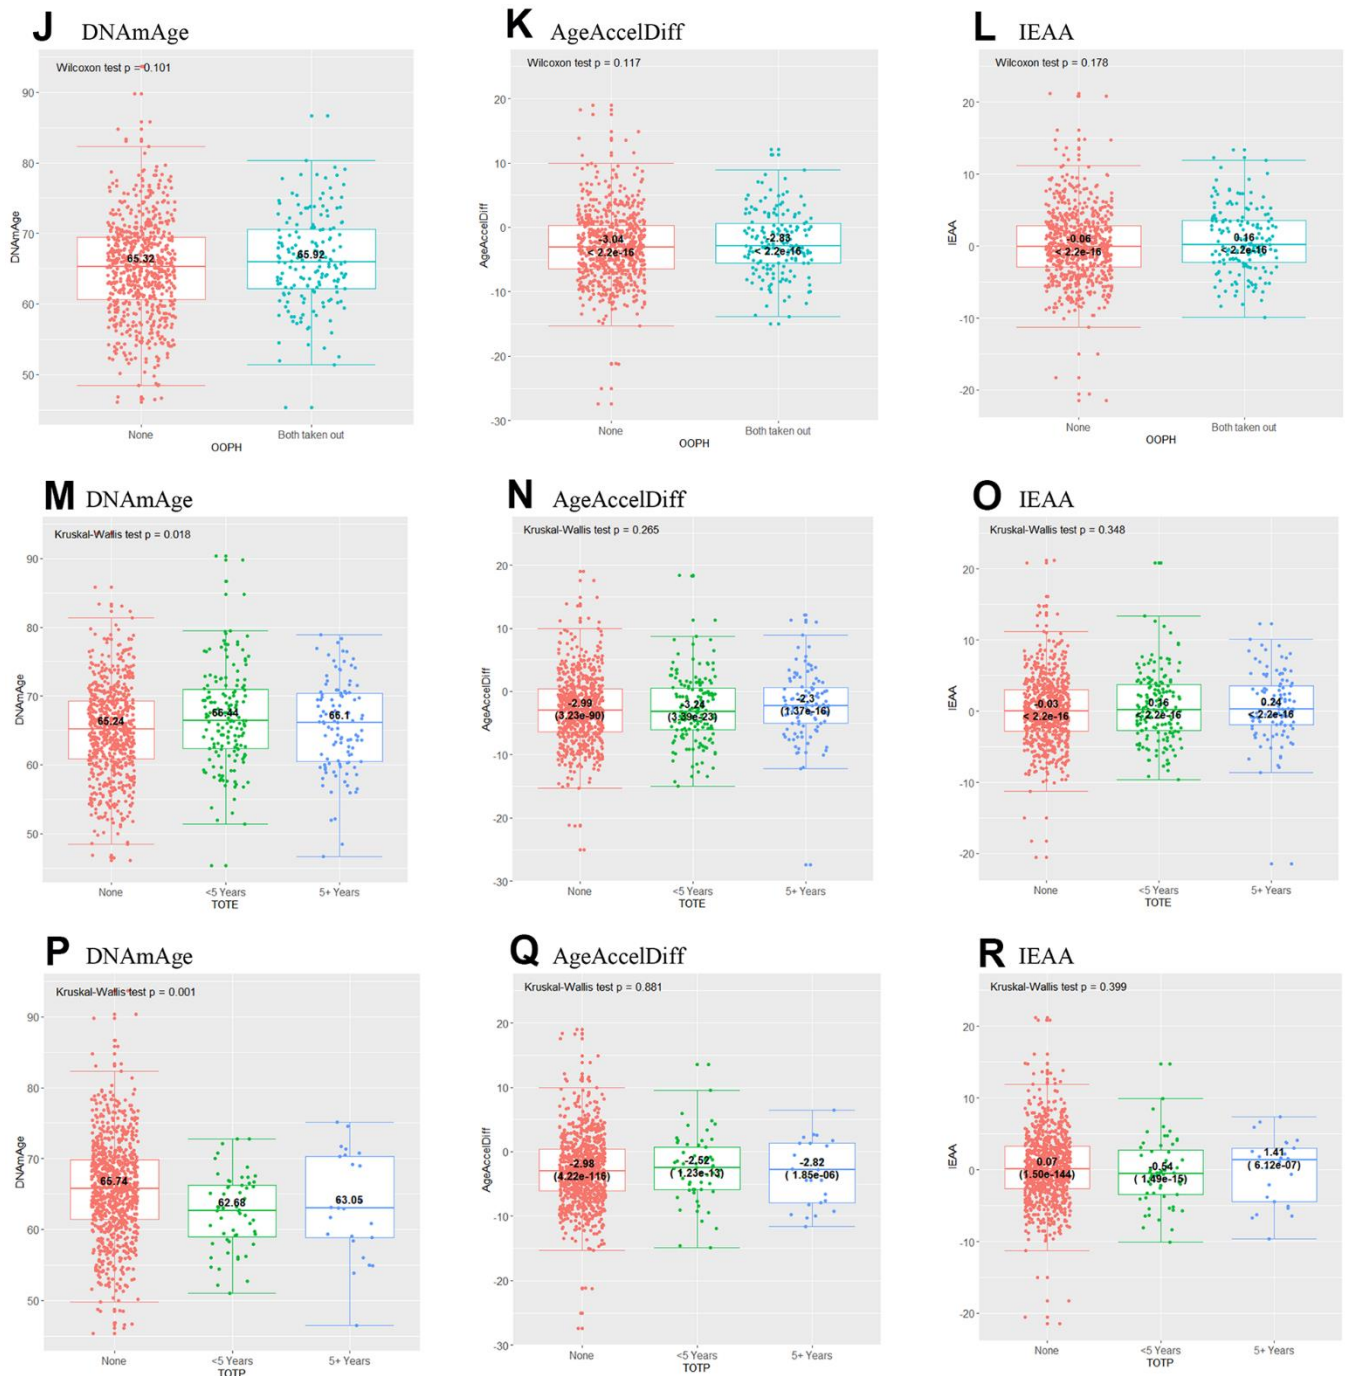

**Supplementary Figure 2. Distribution of DNAmAge/AgeAccelDiff/IEAA by BC-risk factors (except body mass index, diet, smoking, and alcohol).** By waist circumference, (A–C); WHR, (D–F); DM, (G–I); OOPH, (J–L); TOTE, (M–O); TOTP, (P–R). (AgeAccelDiff, epigenetic age acceleration as departure of DNAmAge from chronological age; IEAA, intrinsic epigenetic age acceleration as residuals adjusted for cell composition; BC, breast cancer; Cat, Categories; DM, diabetes; DNAmAge, DNA methylation–based marker of aging; OOPH, oophorectomy; TOTE, total duration of unopposed estrogen use; TOTP, total duration of opposed estrogen plus progestin use; WHR, waist-to-hip ratio).



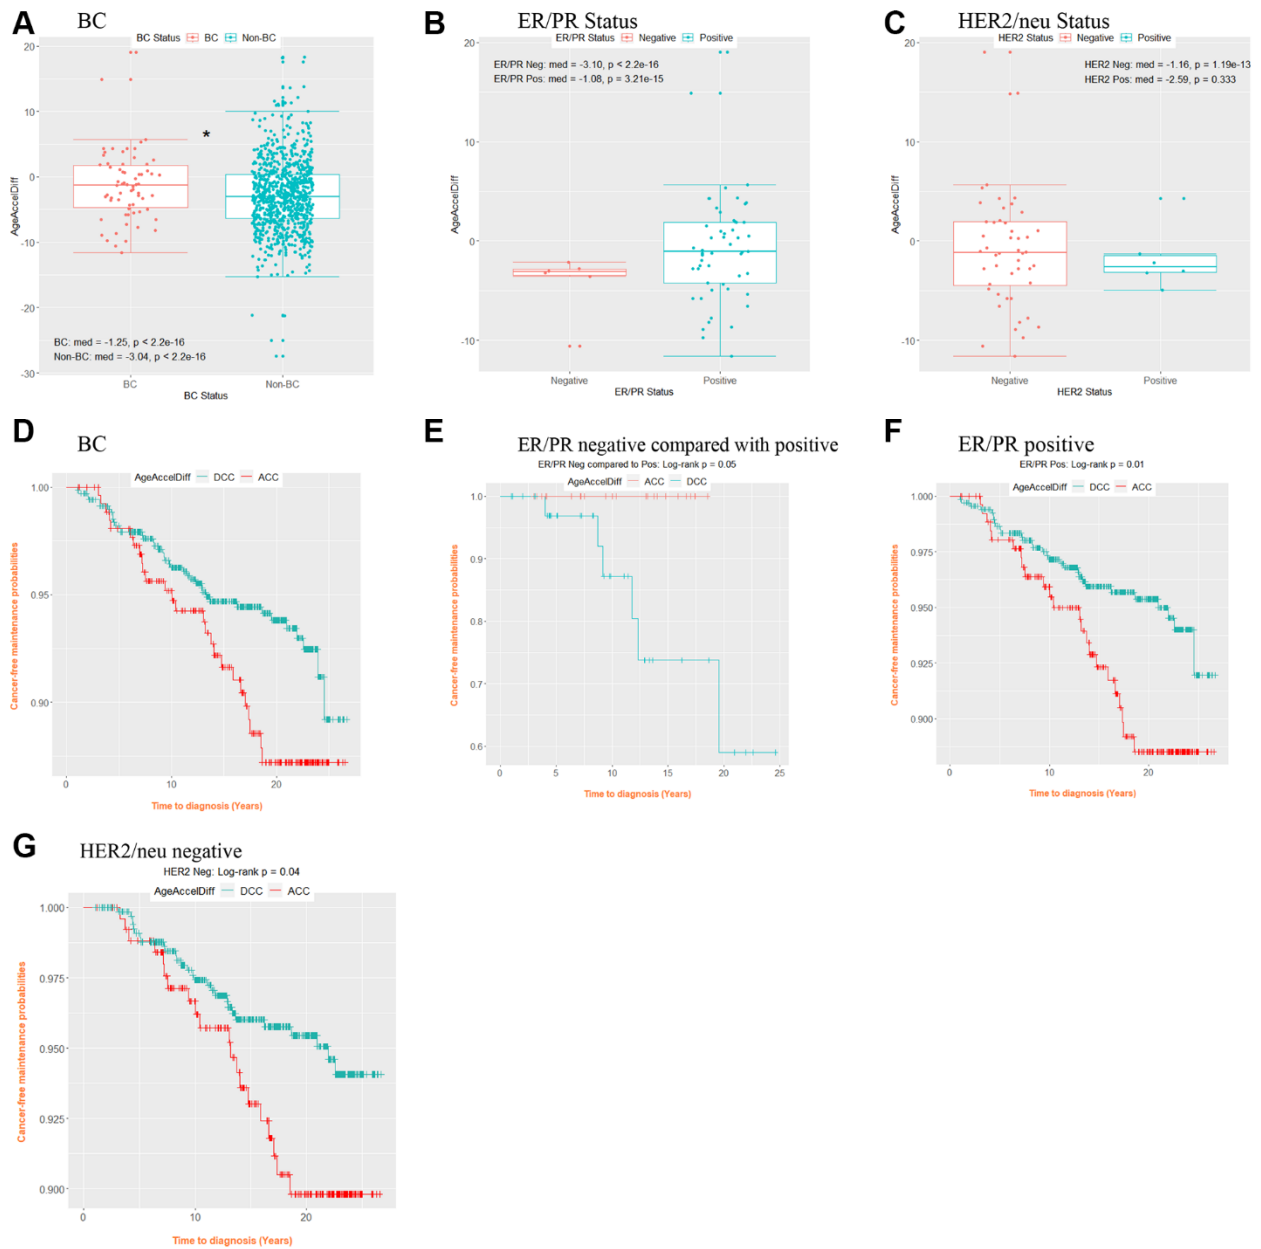

**Supplementary Figure 3.** Distribution (A–C) and cancer-free probability curve (D–G) of AgeAccelDiff by BC status and BC subtype. (AgeAccelDiff, epigenetic age acceleration as departure of DNAmAge from chronologic age; ACC, acceleration, i.e., positive difference of DNAm age from chronologic age; BC, breast cancer; DCC, deceleration, i.e., negative difference of DNAm age from chronologic age; DNAmAge, DNA methylation–based marker of aging; ER/PR, estrogen and progesterone receptor; HER2/neu, human epidermal growth factor receptor 2).

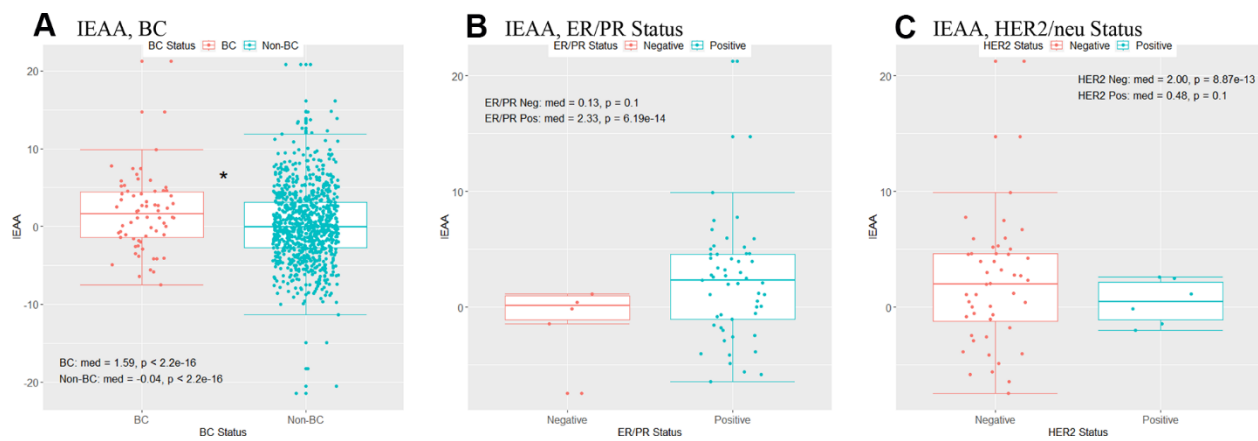

**Supplementary Figure 4.** Distribution of IEAA by BC status (A) and BC subtype (B, C). (IEAA, intrinsic epigenetic age acceleration as residuals adjusted for cell composition; BC, breast cancer; ER/PR, estrogen and progesterone receptor; HER2/neu, human epidermal growth factor receptor 2).

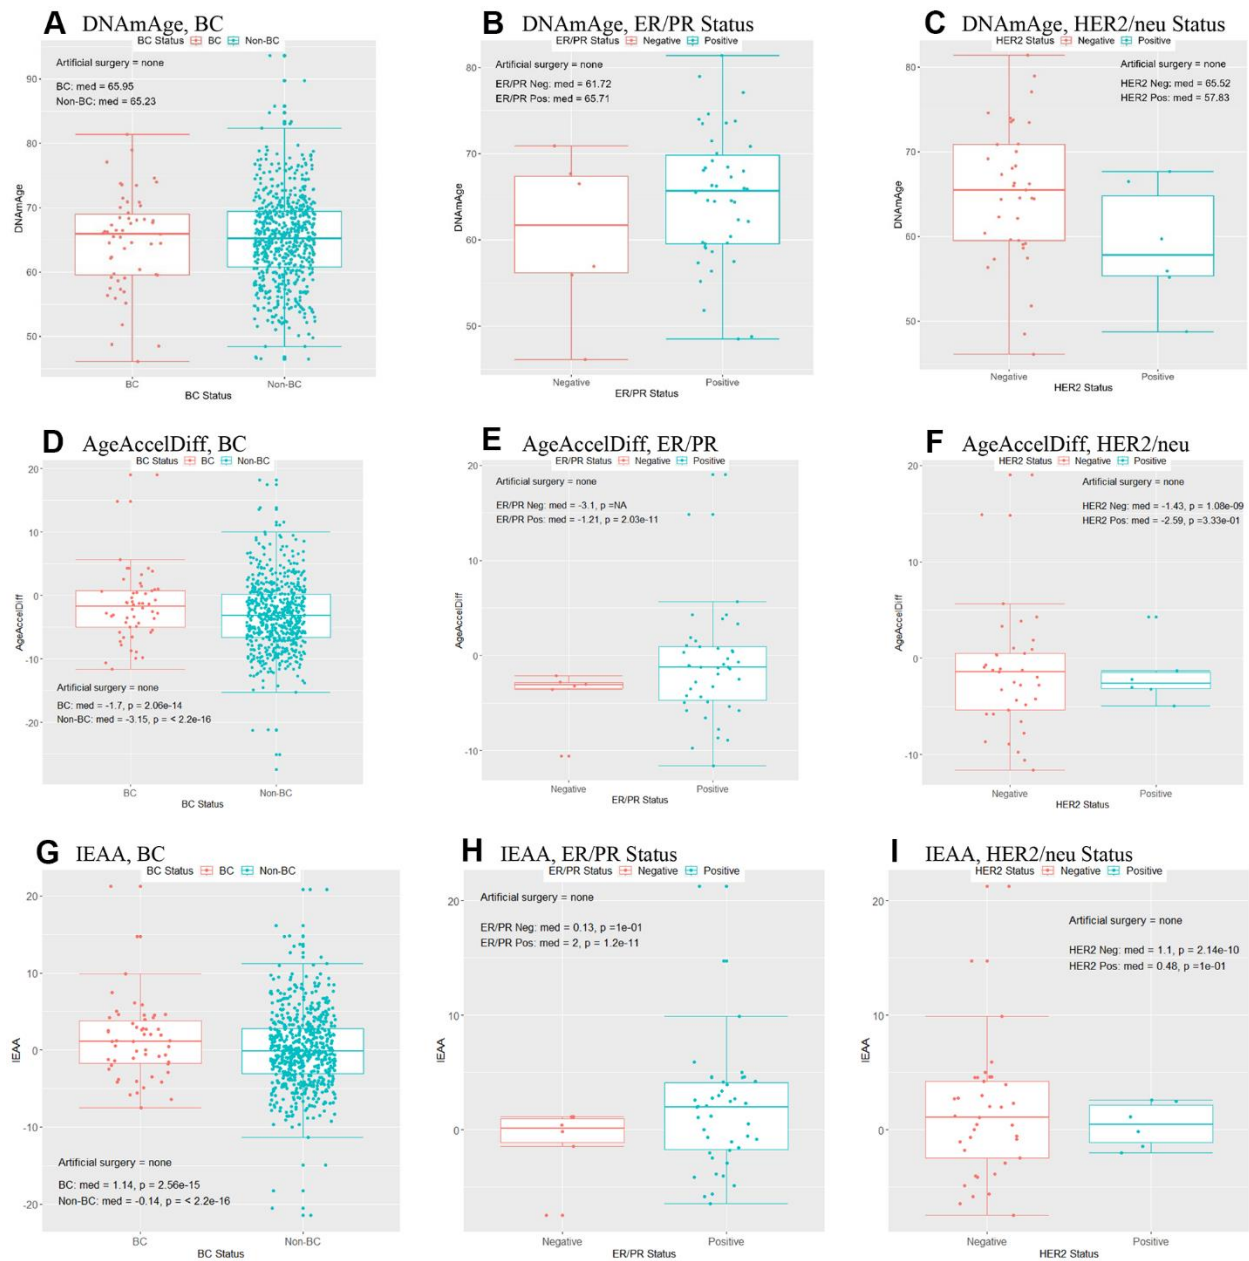

**Supplementary Figure 5. Women without a history of oophorectomy.** Distribution of DNAmAge (A–C)/AgeAccelDiff (D–F)/IEAA (G–I) by BC status and BC subtype. (AgeAccelDiff, epigenetic age acceleration measured as departure of DNAmAge from chronologic age; IEAA, intrinsic epigenetic age acceleration as residuals adjusted for cell composition; BC, breast cancer; DNAmAge, DNA methylation–based marker of aging; ER/PR, estrogen and progesterone receptor; HER2/neu, human epidermal growth factor receptor 2).

< Correlation between DNAmAge/AgeAccelDiff/IEAA and chronologic age by BC status >

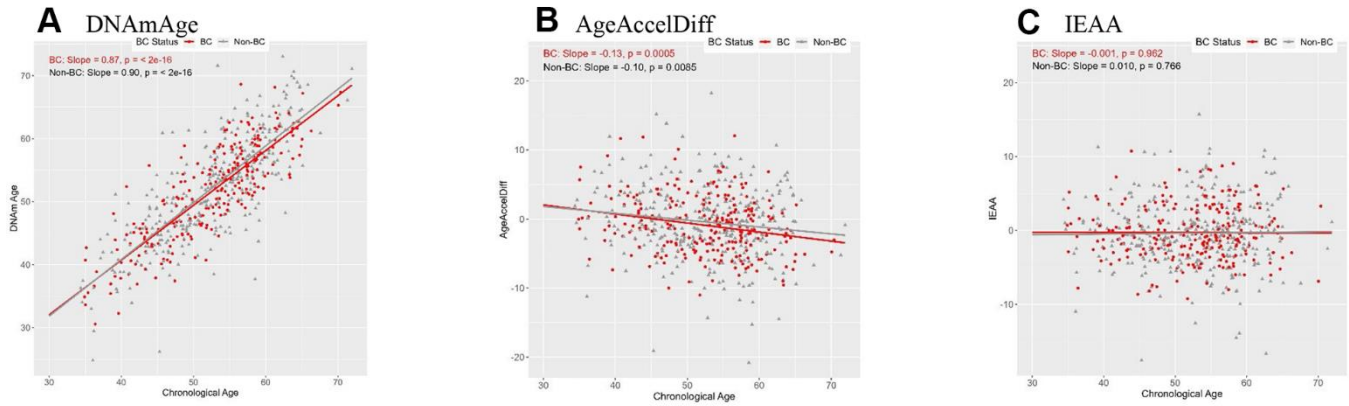

< Distribution of DNAmAge/AgeAccelDiff/IEAA by BC status >

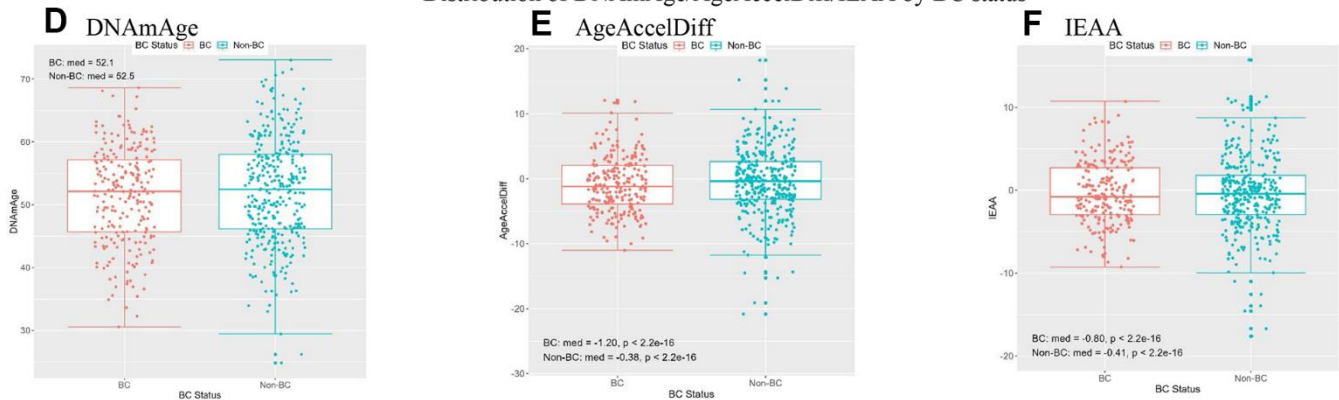

**Supplementary Figure 6. GSE51032: validation tests.** Correlation between DNAmAge (A)/AgeAccelDiff (B)/IEAA (C) and chronologic age by BC status. Distribution of DNAmAge (D)/AgeAccelDiff (E)/IEAA (F) by BC status. (AgeAccelDiff, epigenetic age acceleration measured as departure of DNAmAge from chronologic age; IEAA, intrinsic epigenetic age acceleration measured as residuals by regressing DNAmAge on chronologic age, adjusted for cell composition; BC, breast cancer; DNAmAge, DNA methylation–based marker of aging).
