# Supplementary material for: DNA-methylation age and accelerated epigenetic aging in blood as a tumor marker for predicting breast cancer susceptibility
Source: publisher site journal article supplement (doi:10.18632/aging.206169), 2024-12-05
Supplement: Supplementary file [file aging-v16-206169-supplementary-material-SD2.pdf]

## SUPPLEMENTARY TABLES

**Supplementary Table 1. Association of DNAmAge with selected BC-risk factors by BC status\*.**

### A. Among participants with BC development

| BC risk factor                                                                              | Effect size  | 95% CI               | P               |
|---------------------------------------------------------------------------------------------|--------------|----------------------|-----------------|
| Age at enrollment                                                                           | <b>0.81</b>  | <b>(0.61, 1.01)</b>  | <b>2.17E-11</b> |
| Body mass index, kg/m <sup>2</sup> § (≥ 18.5 to < 25, normal, vs. ≥ 25 to < 30, overweight) | -1.84        | (-6.63, 2.95)        | 0.445           |
| ≥ 30 to < 40, obesity                                                                       | 1.07         | (-3.24, 5.38)        | 0.621           |
| ≥ 40, extreme obesity                                                                       | <b>16.41</b> | <b>(1.65, 31.18)</b> | <b>0.030</b>    |

### B. Among participants without BC development

| BC risk factor                                              | Effect size  | 95% CI                | P               |
|-------------------------------------------------------------|--------------|-----------------------|-----------------|
| Age at enrollment                                           | <b>0.73</b>  | <b>(0.67, 0.78)</b>   | <b>5.24E-12</b> |
| Waist-to-hip ratio                                          | <b>7.77</b>  | <b>(2.05, 13.49)</b>  | <b>0.008</b>    |
| Waist-to-hip ratio** (≤ 0.85 vs. > 0.85)                    | <b>1.11</b>  | <b>(0.19, 2.02)</b>   | <b>0.018</b>    |
| Healthy eating index-2015                                   | <b>0.07</b>  | <b>(0.03, 0.11)</b>   | <b>0.002</b>    |
| Healthy eating index-2015¥ (≤ 65.29 vs. > 65.29)            | <b>1.52</b>  | <b>(0.63, 2.41)</b>   | <b>0.001</b>    |
| Pack-years of smoking (never vs. < 5 years)                 | -0.40        | (-1.89, 1.08)         | 0.594           |
| 5 to < 20 years                                             | <b>-1.61</b> | <b>(-3.06, -0.16)</b> | <b>0.030</b>    |
| 20 + years                                                  | <b>-1.59</b> | <b>(-2.71, -0.47)</b> | <b>0.006</b>    |
| Exogenous estrogen only (never use vs. < 5 years)           | <b>1.89</b>  | <b>(0.70, 3.07)</b>   | <b>0.002</b>    |
| 5 to < 10 years                                             | -1.00        | (-3.06, 1.06)         | 0.342           |
| 10 + years                                                  | 1.73         | (-0.02, 3.48)         | 0.053           |
| Exogenous estrogen plus progestin (never use vs. < 5 years) | <b>-2.94</b> | <b>(-4.82, -1.06)</b> | <b>0.002</b>    |
| 5 to < 10 years                                             | -2.32        | (-6.02, 1.38)         | 0.219           |
| 10 + years                                                  | -3.34        | (-7.78, 1.09)         | 0.140           |

BC, breast cancer; CI, confidence interval; DNAmAge, DNA methylation–based marker of aging. Numbers in bold face are statistically significant.

\* Only factors having *statistically significant* association with DNAmAge are displayed.

§ Among BC patients, no one had body mass index < 18.5.

\*\* Waist-to-hip ratio was categorized using 0.85, where cutoff levels or higher fall within visceral obese range [73].

¥ Healthy eating index-2015 variable is dichotomized by a median (= 65.29).

**Supplementary Table 2. Association of AgeAccelDiff with selected BC-risk factors by BC status\*.**

**A. Among participants with BC development**

| <b>BC risk factor</b>                                                                       | <b>Effect size</b> | <b>95% CI</b>         | <b>P</b>        |
|---------------------------------------------------------------------------------------------|--------------------|-----------------------|-----------------|
| Body mass index, kg/m <sup>2</sup> § (≥ 18.5 to < 25, normal, vs. ≥ 25 to < 30, overweight) | 0.15               | (-3.05, 3.36)         | 0.923           |
| ≥ 30 to < 40, obesity                                                                       | 0.79               | (-2.09, 3.67)         | 0.585           |
| ≥ 40, extreme obesity                                                                       | <b>21.03</b>       | <b>(11.17, 30.90)</b> | <b>7.04E-05</b> |

**B. Among participants without BC development**

| <b>BC risk factor</b>                                                                | <b>Effect size</b> | <b>95% CI</b>         | <b>P</b>        |
|--------------------------------------------------------------------------------------|--------------------|-----------------------|-----------------|
| Age at enrollment                                                                    | <b>-0.27</b>       | <b>(-0.33, -0.22)</b> | <b>1.28E-22</b> |
| Body mass index, kg/m <sup>2</sup>                                                   | <b>0.14</b>        | <b>(0.08, 0.20)</b>   | <b>1.28E-05</b> |
| Body mass index, kg/m <sup>2</sup> (≥ 18.5 to < 25, normal, vs. < 18.5, underweight) | -0.51              | (-3.84, 2.83)         | 0.766           |
| ≥ 25 to < 30, overweight                                                             | 0.60               | (-0.28, 1.49)         | 0.181           |
| ≥ 30 to < 40, obesity                                                                | <b>1.75</b>        | <b>(0.86, 2.64)</b>   | <b>0.0001</b>   |
| ≥ 40, extreme obesity                                                                | <b>3.92</b>        | <b>(1.92, 5.92)</b>   | <b>0.0001</b>   |
| Waist circumference, cm                                                              | <b>0.06</b>        | <b>(0.03, 0.08)</b>   | <b>6.38E-06</b> |
| Waist circumference, cm** (≤ 88 vs. > 88)                                            | <b>1.09</b>        | <b>(0.39, 1.79)</b>   | <b>0.002</b>    |
| Waist-to-hip ratio                                                                   | <b>4.91</b>        | <b>(0.41, 9.42)</b>   | <b>0.032</b>    |

AgeAccelDiff, epigenetic age acceleration measured as departure of DNAmAge from chronologic age; BC, breast cancer; CI, confidence interval; DNAmAge, DNA methylation-based marker of aging. Numbers in bold face are statistically significant.

\* Only factors having *statistically significant* association with DNAmAge are displayed.

§ Among BC patients, no one had body mass index < 18.5.

\*\* Waist-to-hip ratio was categorized using 0.85, where cutoff levels or higher fall within visceral obese range [73].

**Supplementary Table 3. Association of IEAA with selected BC-risk factors by BC status\*.**

**A. Among participants with BC development**

| <b>BC risk factor</b>                                                                       | <b>Effect size</b> | <b>95% CI</b>         | <b>P</b>        |
|---------------------------------------------------------------------------------------------|--------------------|-----------------------|-----------------|
| Body mass index, kg/m <sup>2</sup> § (≥ 18.5 to < 25, normal, vs. ≥ 25 to < 30, overweight) | 0.35               | (-2.50, 3.20)         | 0.808           |
| ≥ 30 to < 40, obesity                                                                       | 0.54               | (-2.02, 3.10)         | 0.675           |
| ≥ 40, extreme obesity                                                                       | <b>20.17</b>       | <b>(11.39, 28.95)</b> | <b>2.19E-05</b> |

**B. Among participants without BC development**

| <b>BC risk factor</b>                                                                | <b>Effect size</b> | <b>95% CI</b>         | <b>P</b>      |
|--------------------------------------------------------------------------------------|--------------------|-----------------------|---------------|
| Age at enrollment                                                                    | <b>-0.07</b>       | <b>(-0.12, -0.02)</b> | <b>0.011</b>  |
| Body mass index, kg/m <sup>2</sup>                                                   | <b>0.09</b>        | <b>(0.04, 0.15)</b>   | <b>0.001</b>  |
| Body mass index, kg/m <sup>2</sup> (≥ 18.5 to < 25, normal, vs. < 18.5, underweight) | 0.25               | (-2.76, 3.26)         | 0.871         |
| ≥ 25 to < 30, overweight                                                             | 0.51               | (-0.29, 1.31)         | 0.211         |
| ≥ 30 to < 40, obesity                                                                | <b>1.14</b>        | <b>(0.34, 1.95)</b>   | <b>0.006</b>  |
| ≥ 40, extreme obesity                                                                | <b>2.97</b>        | <b>(1.16, 4.77)</b>   | <b>0.001</b>  |
| Waist circumference, cm                                                              | <b>0.04</b>        | <b>(0.02, 0.06)</b>   | <b>0.0003</b> |
| Waist circumference, cm** (≤ 88 vs. > 88)                                            | <b>0.78</b>        | <b>(0.15, 1.41)</b>   | <b>0.015</b>  |
| Waist-to-hip ratio                                                                   | <b>4.52</b>        | <b>(0.48, 8.56)</b>   | <b>0.028</b>  |

BC, breast cancer; CI, confidence interval; DNAmAge, DNA methylation–based marker of aging; IEAA, intrinsic epigenetic age acceleration as residuals by regressing DNAmAge on chronologic age, adjusted for cell composition. Numbers in bold face are statistically significant.

\* Only factors having *statistically significant* association with DNAmAge are displayed.

§ Among BC patients, no one had body mass index < 18.5.

\*\* Waist circumference was categorized using 88 cm, where cutoff levels or higher fall within visceral obese range [73].

**Supplementary Table 4. Multiple Cox regression for the DNAmAge for BC development in different time segments\*.**

| <b>Within 5 years</b>       |             |                     |                   |
|-----------------------------|-------------|---------------------|-------------------|
| <b>BC subtype</b>           | <b>HR†</b>  | <b>95% CI</b>       | <b>P</b>          |
| Overall                     | <b>1.25</b> | <b>(1.05, 1.47)</b> | <b>0.010</b>      |
| ER/PR positive              | <b>1.42</b> | <b>(1.29, 1.57)</b> | <b>&lt; 0.001</b> |
| <b>Within 5 to 15 years</b> |             |                     |                   |
| <b>BC subtype</b>           | <b>HR†</b>  | <b>95% CI</b>       | <b>P</b>          |
| Overall                     | <b>0.94</b> | <b>(0.89, 1.00)</b> | <b>0.040</b>      |
| ER/PR positive              | 0.95        | (0.89, 1.01)        | 0.094             |
| ER/PR negative              | <b>0.83</b> | <b>(0.69, 1.00)</b> | <b>0.044</b>      |
| Her2/neu negative           | <b>0.94</b> | <b>(0.88, 1.00)</b> | <b>0.041</b>      |
| <b>Within 15 years</b>      |             |                     |                   |
| <b>BC subtype</b>           | <b>HR†</b>  | <b>95% CI</b>       | <b>P</b>          |
| Overall                     | 0.96        | (0.92, 1.00)        | 0.076             |
| ER/PR positive              | 0.97        | (0.92, 1.01)        | 0.164             |
| ER/PR negative              | <b>0.84</b> | <b>(0.75, 0.95)</b> | <b>0.005</b>      |
| Her2/neu negative           | <b>0.95</b> | <b>(0.90, 1.00)</b> | <b>0.036</b>      |

BC, breast cancer; CI, confidence interval; DNAmAge, DNA methylation–based marker of aging; ER/PR, estrogen and progesterone receptor; HER2/neu, human epidermal growth factor receptor 2; HR, hazard ratio. Numbers in bold face are statistically significant.

\* Results from the analyses for the total period are not present owing to no statistical significance.

† HR adjusted by body mass index, waist-to-hip ratio, diabetes at enrollment, healthy eating index-2015, alcohol intake (none, past, < 1 drink/month, < 1 drink/week, 1 to < 7 drinks/week, and 7+ drinks/week), pack-years of smoking (never, < 5 years, 5–20 years, and ≥ 20 years), oophorectomy (none, one and/or part taken out, and both taken out), total duration of unopposed estrogen only use (never, < 5 years, 5–10 years, and 10+ years), and total duration of opposed estrogen plus progestin use (never, < 5 years, 5–10 years, and 10+ years).

**Supplementary Table 5. GSE51032: validation tests.**

| <b>DNAmAge</b> |            |               |          |
|----------------|------------|---------------|----------|
| <b>BC</b>      | <b>OR†</b> | <b>95% CI</b> | <b>P</b> |
| Overall        | 0.99       | (0.97, 1.01)  | 0.330    |

  

| <b>AgeAccelDiff</b> |            |               |          |
|---------------------|------------|---------------|----------|
| <b>BC</b>           | <b>OR†</b> | <b>95% CI</b> | <b>P</b> |
| Overall             | 0.98       | (0.95, 1.01)  | 0.247    |

  

| <b>IEAA</b> |            |               |          |
|-------------|------------|---------------|----------|
| <b>BC</b>   | <b>OR†</b> | <b>95% CI</b> | <b>P</b> |
| Overall     | 1.00       | (0.96, 1.04)  | 0.850    |

AgeAccelDiff, epigenetic age acceleration measured as departure of DNAmAge from chronologic age; BC, breast cancer; CI, confidence interval; DNAmAge, DNA methylation-based marker of aging; IEAA, intrinsic epigenetic age acceleration as residuals by regressing DNAmAge on chronologic age, adjusted for cell composition; OR, odds ratio.

† ORs obtained from univariate analyses.

Logistic regression for the DNAmAge/AgeAccelDiff/IEAA for BC.
